# Supplementary material for: Growth of MIN-6 Cells on Salmon Fibrinogen Scaffold Improves Insulin Secretion
Source: MDPI journal article supplement (doi:10.3390/pharmaceutics14050941), 2022-04-26
Supplement: s1 [file s1]

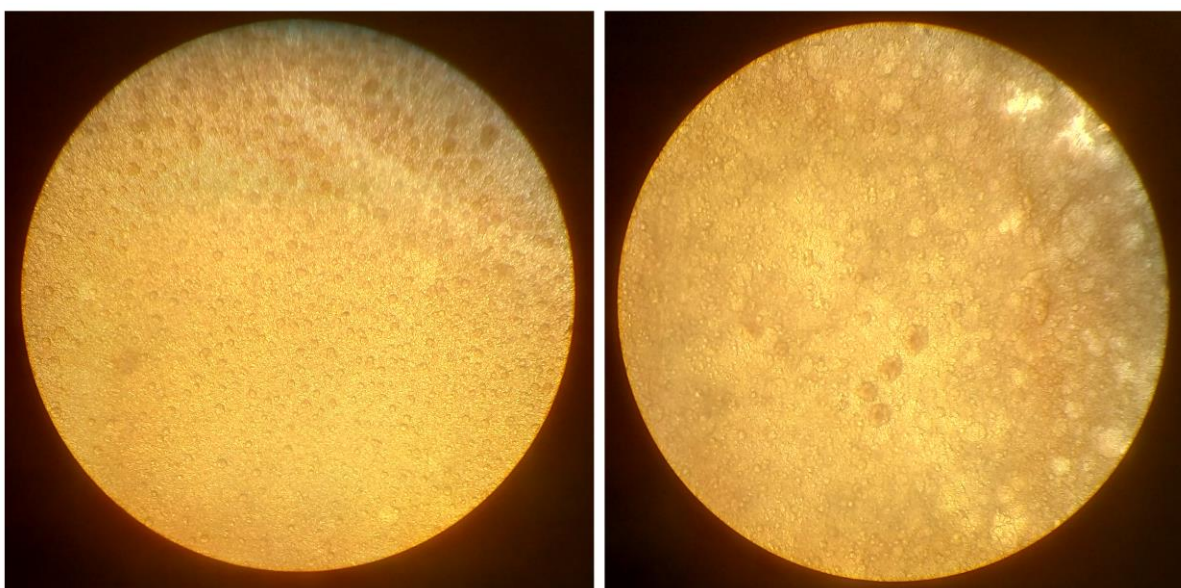

Figure S1: Images taken with smartphone camera through the ocular of the phase contrast microscope (50x magnification) showing pseudoislet formation of MIN-6 cells on chitosan (CS, left) and Fibrinogen/chitosan scaffold (FCS, right) at day 8 of culture.
